# Supplementary material for: Immunoinformatic Design of a Multivalent Peptide Vaccine Against Mucormycosis: Targeting FTR1 Protein of Major Causative Fungi
Source: Frontiers journal article supplement (doi:10.3389/fimmu.2022.863234), 2022-05-26
Supplement: Image_1.PDF [file Image_1.PDF]

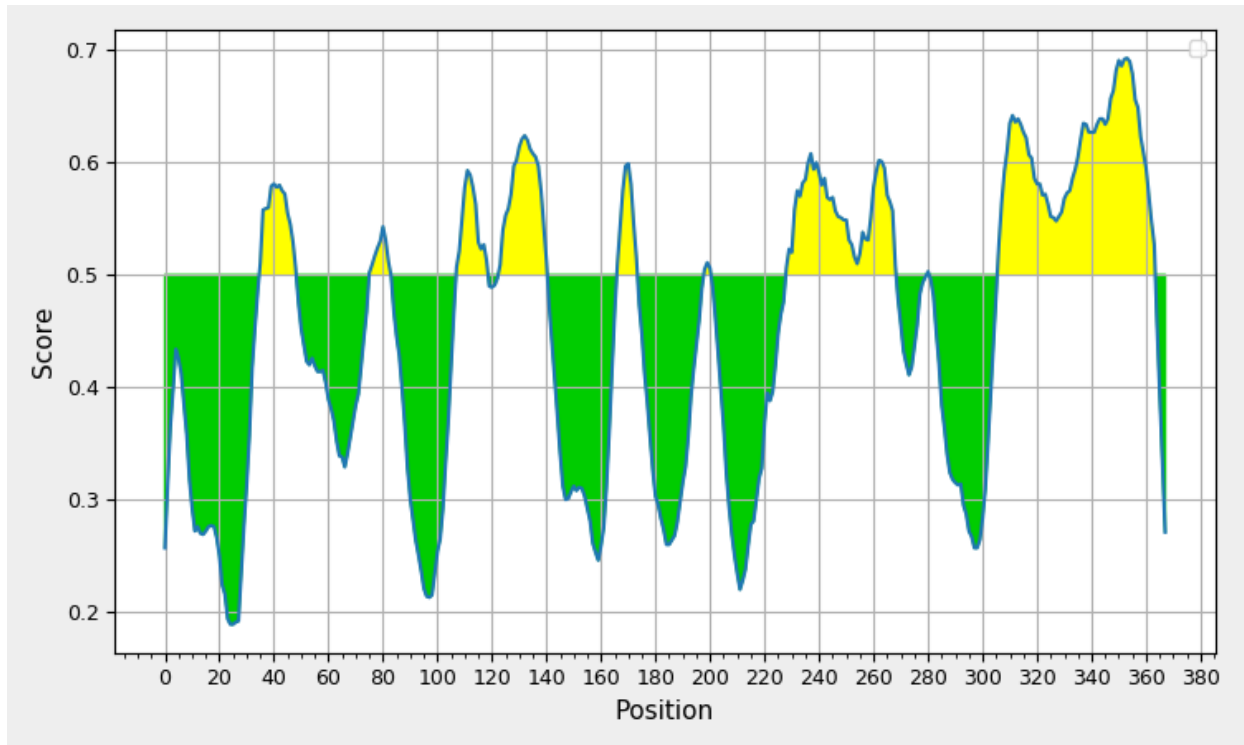

**Figure S1.** LBL epitopes were predicted using Bepipred linear epitope prediction. Scores above the default threshold of 0.500 denoted by yellow color represent B-cell epitopes.
